# Supplementary material for: DNA repair deregulation in discrete prostate cancer lesions identified on multi-parametric MRI and targeted by MRI/ultrasound fusion-guided biopsy
Source: PubMed Central journal article supplement (PMC5620234; doi:10.18632/oncotarget.19145), 2017-07-10
Supplement: oncotarget-08-68038-s001.pdf [file oncotarget-08-68038-s001.pdf]

# DNA repair deregulation in discrete prostate cancer lesions identified on multi-parametric MRI and targeted by MRI/ultrasound fusion-guided biopsy

## SUPPLEMENTARY MATERIALS

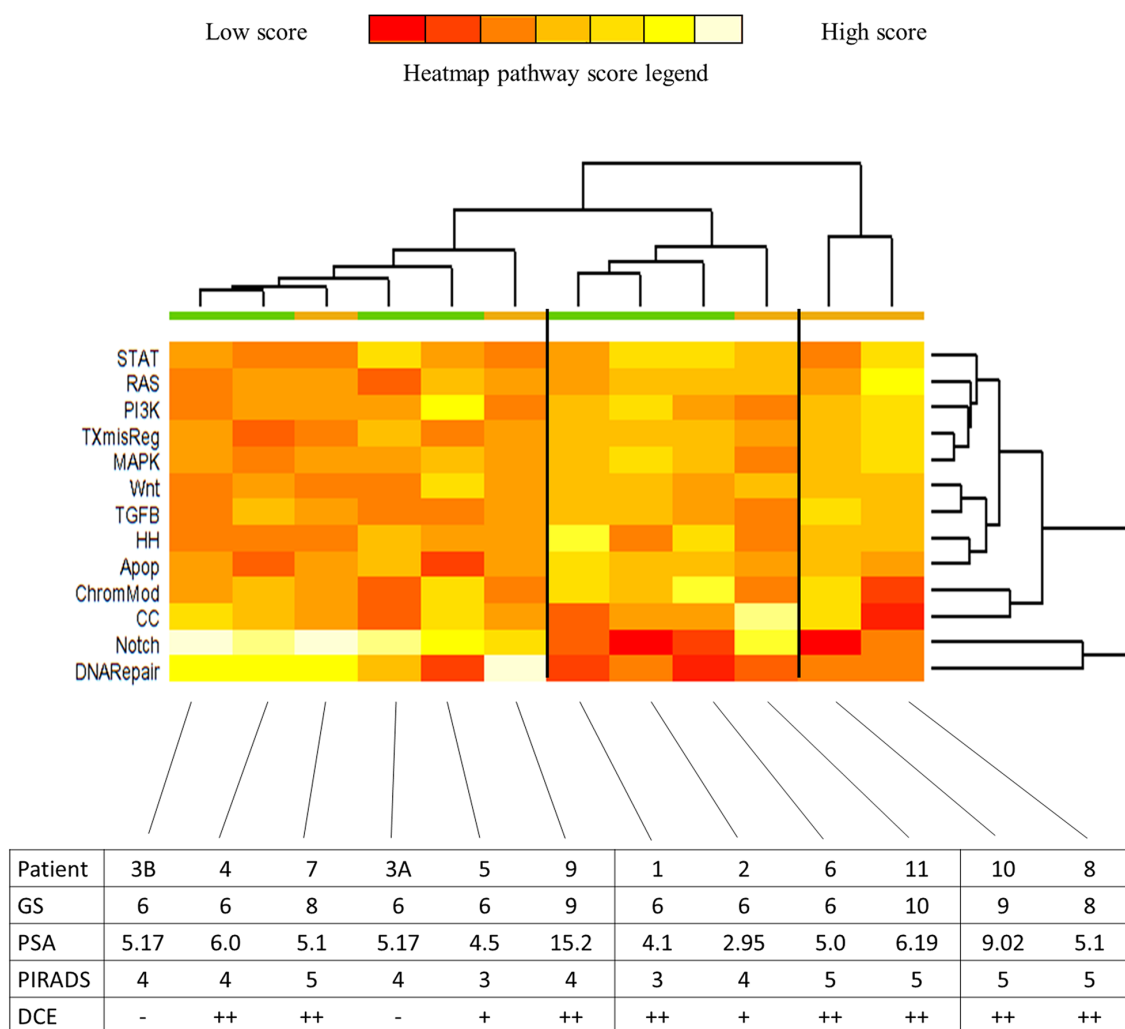

**Supplementary Figure 1: Heat map of pathway scores or all intra-prostatic lesions and associated clinical and radiographic characteristics.** Samples clustered into three groups based on molecular characteristics, but each group had relatively heterogeneous clinical characteristics. Future work will aim to determine how traditionally high-risk lesions with low-risk molecular features or low-risk lesions with high-risk molecular features behave clinically.

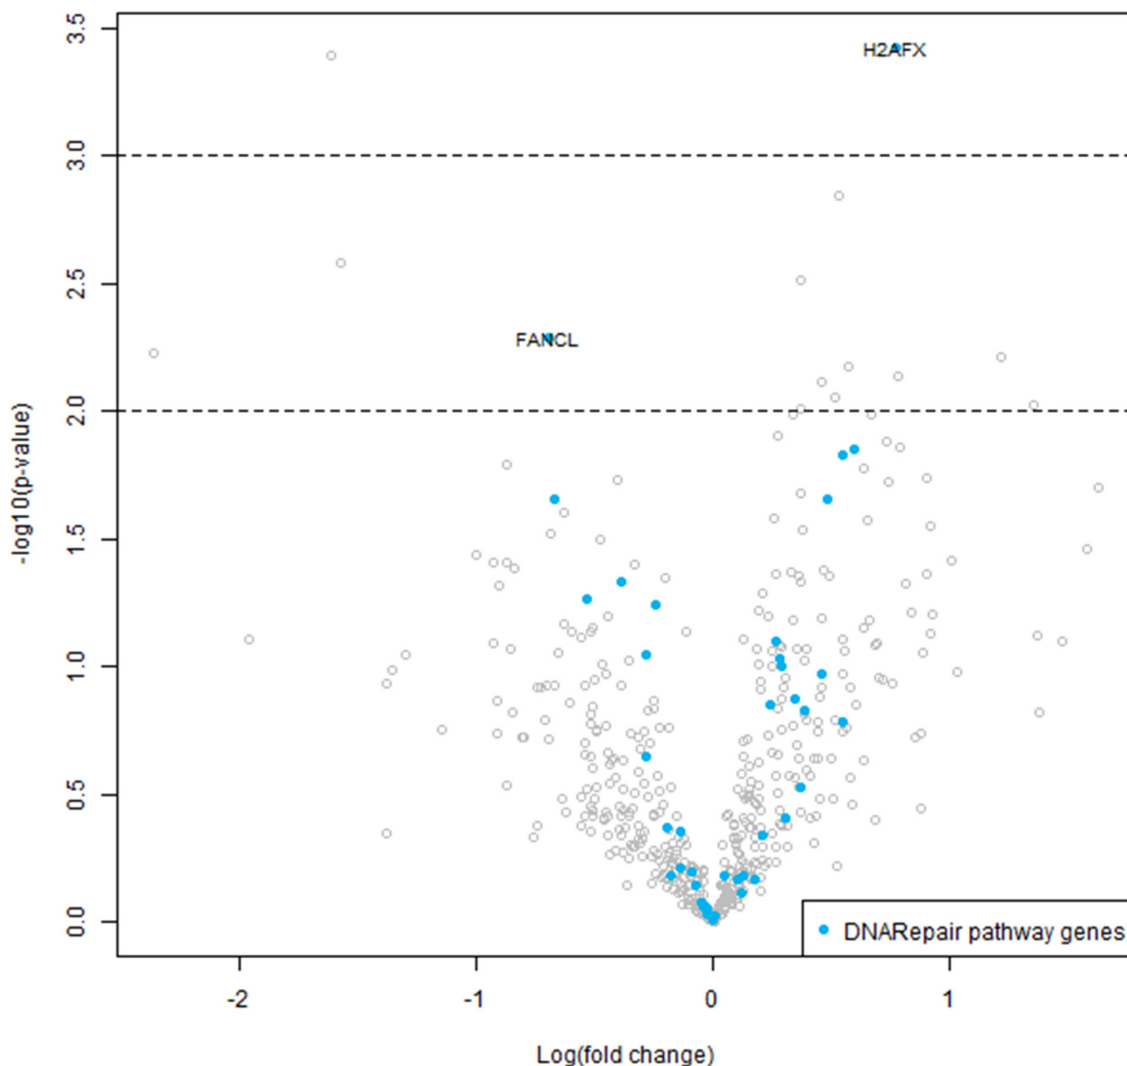

**Supplementary Figure 2: Volcano plot showing differential gene expression for GS  $\geq$ 8 lesions compared GS 6 lesions.** Individual DNA Repair genes are highlighted in blue. The log-fold change in gene expression is plotted against the  $-\log_{10}$  of the p-value from the comparison of gene expression between groups. The distance right or left of a gene on the graph corresponds to the magnitude of increased or decreased expression. The height of a gene on the graph corresponds to a lower p-value.

**Supplementary Table 1: All genes included in the gene expression analysis organized by pathway.**

See Supplementary File 1
